# Supplementary material
Source: MDPI journal article supplement (https://www.mdpi.com/2071-1050/10/1/91)
Supplement: s1 [file s1]

## Additional File

**Table S1.** Percentages (unitless) of class distribution for pollution assessment of soil metals in Central China using geoaccumulation index.

|                                   | <b>Cu</b> | <b>Cr</b> | <b>Cd</b> | <b>Zn</b> | <b>Pb</b> | <b>Hg</b> | <b>As</b> |
|-----------------------------------|-----------|-----------|-----------|-----------|-----------|-----------|-----------|
| Central China                     |           |           |           |           |           |           |           |
| unpolluted                        | 68.6%     | 86.2%     | 37.8%     | 72.2%     | 62.2%     | 47.4%     | 59.1%     |
| unpolluted to moderately polluted | 28.6%     | 13.8%     | 24.3%     | 19.4%     | 21.6%     | 10.5%     | 18.2%     |
| moderately polluted               | 2.9%      | 0.0%      | 8.1%      | 2.8%      | 10.8%     | 5.3%      | 9.1%      |
| moderately to heavily polluted    | 0.0%      | 0.0%      | 13.5%     | 2.8%      | 2.7%      | 10.5%     | 13.6%     |
| heavily polluted                  | 0.0%      | 0.0%      | 2.7%      | 2.8%      | 2.7%      | 15.8%     | 0.0%      |
| heavily to extremely polluted     | 0.0%      | 0.0%      | 2.7%      | 0.0%      | 0.0%      | 0.0%      | 0.0%      |
| extremely polluted                | 0.0%      | 0.0%      | 10.8%     | 0.0%      | 0.0%      | 10.5%     | 0.0%      |
| Henan Province                    |           |           |           |           |           |           |           |
| unpolluted                        | 0.0%      | 85.7%     | 0.0%      | 0.0%      | 12.5%     | 0.0%      | 0.0%      |
| unpolluted to moderately polluted | 100.0%    | 14.3%     | 0.0%      | 57.1%     | 25.0%     | 0.0%      | 37.5%     |
| moderately polluted               | 0.0%      | 0.0%      | 0.0%      | 14.3%     | 50.0%     | 0.0%      | 25.0%     |
| moderately to heavily polluted    | 0.0%      | 0.0%      | 25.0%     | 14.3%     | 0.0%      | 28.6%     | 37.5%     |
| heavily polluted                  | 0.0%      | 0.0%      | 12.5%     | 14.3%     | 12.5%     | 42.9%     | 0.0%      |
| heavily to extremely polluted     | 0.0%      | 0.0%      | 12.5%     | 0.0%      | 0.0%      | 0.0%      | 0.0%      |
| extremely polluted                | 0.0%      | 0.0%      | 50.0%     | 0.0%      | 0.0%      | 28.6%     | 0.0%      |
| Hubei Province                    |           |           |           |           |           |           |           |
| unpolluted                        | 94.1%     | 100.0%    | 76.5%     | 100.0%    | 82.4%     | 85.7%     | 87.5%     |
| unpolluted to moderately polluted | 0.0%      | 0.0%      | 5.9%      | 0.0%      | 11.8%     | 14.3%     | 12.5%     |
| moderately polluted               | 5.9%      | 0.0%      | 5.9%      | 0.0%      | 0.0%      | 0.0%      | 0.0%      |
| moderately to heavily polluted    | 0.0%      | 0.0%      | 11.8%     | 0.0%      | 5.9%      | 0.0%      | 0.0%      |
| heavily polluted                  | 0.0%      | 0.0%      | 0.0%      | 0.0%      | 0.0%      | 0.0%      | 0.0%      |
| heavily to extremely polluted     | 0.0%      | 0.0%      | 0.0%      | 0.0%      | 0.0%      | 0.0%      | 0.0%      |
| extremely polluted                | 0.0%      | 0.0%      | 0.0%      | 0.0%      | 0.0%      | 0.0%      | 0.0%      |
| Hunan Province                    |           |           |           |           |           |           |           |
| unpolluted                        | 72.7%     | 75.0%     | 8.3%      | 75.0%     | 66.7%     | 60.0%     | 100.0%    |
| unpolluted to moderately polluted | 27.3%     | 25.0%     | 66.7%     | 25.0%     | 33.3%     | 20.0%     | 0.0%      |
| moderately polluted               | 0.0%      | 0.0%      | 16.7%     | 0.0%      | 0.0%      | 20.0%     | 0.0%      |
| moderately to heavily polluted    | 0.0%      | 0.0%      | 8.3%      | 0.0%      | 0.0%      | 0.0%      | 0.0%      |
| heavily polluted                  | 0.0%      | 0.0%      | 0.0%      | 0.0%      | 0.0%      | 0.0%      | 0.0%      |
| heavily to extremely polluted     | 0.0%      | 0.0%      | 0.0%      | 0.0%      | 0.0%      | 0.0%      | 0.0%      |
| extremely polluted                | 0.0%      | 0.0%      | 0.0%      | 0.0%      | 0.0%      | 0.0%      | 0.0%      |
